# Supplementary material
Source: PubMed Central journal article supplement (PMC1820699)
Supplement: pnas_0611179104_1.pdf [file pnas_0611179104_1.pdf]

## SI Text

**Solution of the Age-Structured Model with Uniform Age Distribution.** In the age-structured model, if the initial distribution of ages is uniform, given by  $n_i(a) = \hat{n}_i/t_i$ , then the stem cell population is given by

$$N_0(t, a) = \frac{\hat{n}_0}{t_0} (2a_3)^n \quad \text{for } (n-1)t_0 < t-a \leq nt_0. \quad [34]$$

If the cell cycle times satisfy  $t_1/t_0 = p/q$ , where  $p$  and  $q$  are integers, the general solution for the semidifferentiated cells, at the points where  $t-a = qnt_1$ , is given by

$$\begin{aligned} N_1(a + qnt_1, a) &= \frac{\hat{n}_1}{t_1} (2b_3)^{qn} \\ &+ \frac{2a_2 \hat{n}_0 / t_0}{(2a_3)^p - (2b_3)^q} \left( (2a_3)^{p-1} + \sum_{k=1}^{q-1} (2b_3)^{q-k} (2a_3)^{\lfloor kp/q \rfloor} \right) [(2a_3)^{pn} - (2b_3)^{qn}], \quad [35] \end{aligned}$$

where  $\lfloor \cdot \rfloor$  denotes integer part.

**Relating the Age-Structured and Continuous Models.** We relate the age-structured and continuous models for the case in which all cells start with age zero, and the age-structured solution is given by **6–8**. To find the total stem, semidifferentiated and fully differentiated cell populations at a given time in the age-structured model we integrate the age distribution function over all possible ages. For the stem cell population, integrating **6** gives

$$\begin{aligned} \hat{N}_0(t) &= \hat{n}_0 \int_0^{t_0} \sum_{n=0}^{\infty} \delta(t - nt_0 - a) (2a_3)^n da \\ &= \hat{n}_0 \sum_{n=0}^{\infty} (2a_3)^n \left[ \int_0^{t_0} \delta(t - nt_0 - a) da \right] \\ &= \hat{n}_0 (2a_3)^{\lfloor t/t_0 \rfloor}. \quad [36] \end{aligned}$$

The last equality follows since the only  $\delta$ -function which gives a non-zero integral is that satisfying  $nt_0 < t < (n+1)t_0$ , which picks out the single value  $n = \lfloor t/t_0 \rfloor$  from the sum. If  $t$  is much greater than  $t_0$ , so that  $\lfloor t/t_0 \rfloor \approx t/t_0$ , we have

$$\hat{N}_0(t) \approx \hat{n}_0 (2a_3)^{t/t_0}. \quad [37]$$

For the semidifferentiated cell population, integrating **7** gives

$$\begin{aligned} \hat{N}_1(t) &= \hat{n}_1 \sum_{m=0}^{\infty} (2b_3)^m \left[ \int_0^{t_1} \delta(t - a - mt_1) da \right] \\ &+ 2a_2 \hat{n}_0 \sum_{n=1}^{\infty} \sum_{m=0}^{\infty} (2a_3)^{n-1} (2b_3)^m \left[ \int_0^{t_1} \delta(t - a - nt_0 - mt_1) da \right]. \quad [38] \end{aligned}$$

The integral of the first  $\delta$ -function picks out the value  $m = \lfloor t/t_1 \rfloor$ , while that of the second picks out the value  $m = \lfloor t/t_1 - nt_0/t_1 \rfloor$ , giving

$$\hat{N}_1(t) = \hat{n}_1(2b_3)^{\lfloor t/t_1 \rfloor} + 2a_2\hat{n}_0 \sum_{n=1}^{\lfloor t/t_0 \rfloor} (2a_3)^{n-1}(2b_3)^{\lfloor t/t_1 - nt_0/t_1 \rfloor}. \quad [39]$$

The sum can be evaluated exactly at the times  $t = rt_0t_1$ , where  $r$ ,  $t_0$ , and  $t_1$  are integers, giving the approximation

$$\hat{N}_1(t) \approx \hat{A}(2a_3)^{t/t_0} + (\hat{n}_1 - \hat{A})(2b_3)^{t/t_1}, \quad [40]$$

where

$$\hat{A} = \frac{2a_2\hat{n}_0f_1}{(2a_3)^{t_1} - (2b_3)^{t_0}}, \quad \text{and} \quad f_1 = \sum_{n=1}^{t_1} (2a_3)^{t_1-n}(2b_3)^{\lfloor (n-1)t_0/t_1 \rfloor}. \quad [41]$$

For the fully differentiated cell population, integrating **8** gives

$$\begin{aligned} \hat{N}_2(t) = & \hat{n}_2 \sum_{p=0}^{\infty} (1-c)^p \left[ \int_0^{t_2} \delta(t-a-pt_2) da \right] \\ & + 2b_2\hat{n}_1 \sum_{m=1}^{\infty} \sum_{p=0}^{\infty} (2b_3)^{m-1} (1-c)^p \left[ \int_0^{t_2} \delta(t-a-mt_1-pt_2) da \right] \\ & + 2a_2\hat{n}_0(2b_2) \sum_{n=1}^{\infty} \sum_{m=1}^{\infty} \sum_{p=0}^{\infty} (2a_3)^{n-1} (2b_3)^{m-1} (1-c)^p \left[ \int_0^{t_2} \delta(t-a-nt_0-mt_1-pt_2) da \right]. \quad [42] \end{aligned}$$

The first  $\delta$ -function picks out the value  $p = \lfloor t/t_2 \rfloor$ , the second picks out the value  $p = \lfloor t/t_2 - mt_1/t_2 \rfloor$ , and the third picks out the value  $p = \lfloor t/t_2 - nt_0/t_2 - mt_1/t_2 \rfloor$ , giving

$$\begin{aligned} \hat{N}_2(t) = & \hat{n}_2(1-c)^{\lfloor t/t_2 \rfloor} + 2b_2\hat{n}_1 \sum_{m=1}^{\lfloor t/t_1 \rfloor} (2b_3)^{m-1} (1-c)^{\lfloor t/t_2 - mt_1/t_2 \rfloor} \\ & + 2a_2\hat{n}_0(2b_2) \sum_{n=1}^{\lfloor t/t_0 - t_1/t_0 \rfloor} \sum_{m=1}^{\lfloor t/t_1 - nt_0/t_1 \rfloor} (2a_3)^{n-1} (2b_3)^{m-1} (1-c)^{\lfloor t/t_2 - nt_0/t_2 - mt_1/t_2 \rfloor}. \quad [43] \end{aligned}$$

Estimating  $t/t_0 - t_1/t_0 \approx t/t_0$  for large times in **43**, and choosing  $t_2 = t_1$ , the resulting sums can again be evaluated exactly at times  $t = rt_0t_1$ , where  $r$ ,  $t_0$ , and  $t_1$  are integers, giving the approximation

$$\hat{N}_2(t) \approx \hat{B}(2a_3)^{t/t_0} + \hat{C}(2b_3)^{t/t_1} + (\hat{n}_2 - \hat{B} - \hat{C})(1-c)^{t/t_2}, \quad [44]$$

where

$$\hat{B} = \frac{2a_2\hat{n}_0(2b_2)}{2b_3 - (1-c)} \left( \frac{f_1}{(2a_3)^{t_1} - (2b_3)^{t_0}} - \frac{f_2}{(2a_3)^{t_1} - (1-c)^{t_0}} \right), \quad \hat{C} = \frac{2b_2(\hat{n}_1 - \hat{A})}{2b_3 - (1-c)}, \quad [45]$$

and

$$f_2 = \sum_{n=1}^{t_1} (2a_3)^{t_1-n} (1-c)^{\lfloor (n-1)t_0/t_1 \rfloor}. \quad [46]$$
